# Supplementary material for: Nano- and Micro-Porous Chitosan Membranes for Human Epidermal Stratification and Differentiation
Source: MDPI journal article supplement (doi:10.3390/membranes11060394), 2021-05-27
Supplement: s1 [file s1]

# Nano- and Micro-Porous Chitosan Membranes for Human Epidermal Stratification and Differentiation

Simona Salerno <sup>1,\*</sup>, Maria Penelope De Santo <sup>2</sup>, Enrico Drioli <sup>1,3</sup> and Loredana De Bartolo <sup>1,\*</sup>

- 1 Institute on Membrane Technology, National Research Council of Italy (CNR-ITM), via P. Bucci, cubo 17/C, 87036, Rende (CS), Italy; e.drioli@itm.cnr.it (E.D.)
  - 2 Department of Physics and CNR-Nanotec, University of Calabria, via P. Bucci cubo 31/C, 87036, Rende (CS), Italy maria.desanto@fis.unical.it (M.P.D.S.)
  - 3 College of Chemical Engineering, Nanjing Tech University, Ximofan Road, Nanjing 210009, China
- \* Correspondence: s.salerno@itm.cnr.it, Tel.: +39 0984 492034 (S.S.); l.debartolo@itm.cnr.it Tel.: +39 0984 492036 (L.D.B.).

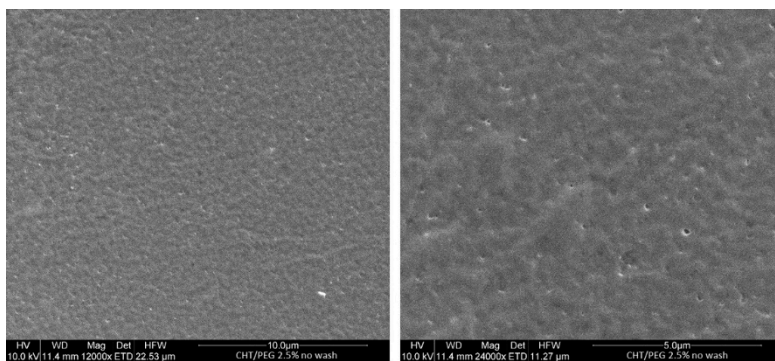

**Figure S 1.** SEM images at different magnification of membranes obtained by 2.5% CHT/PEG without the porogen dissolution process.

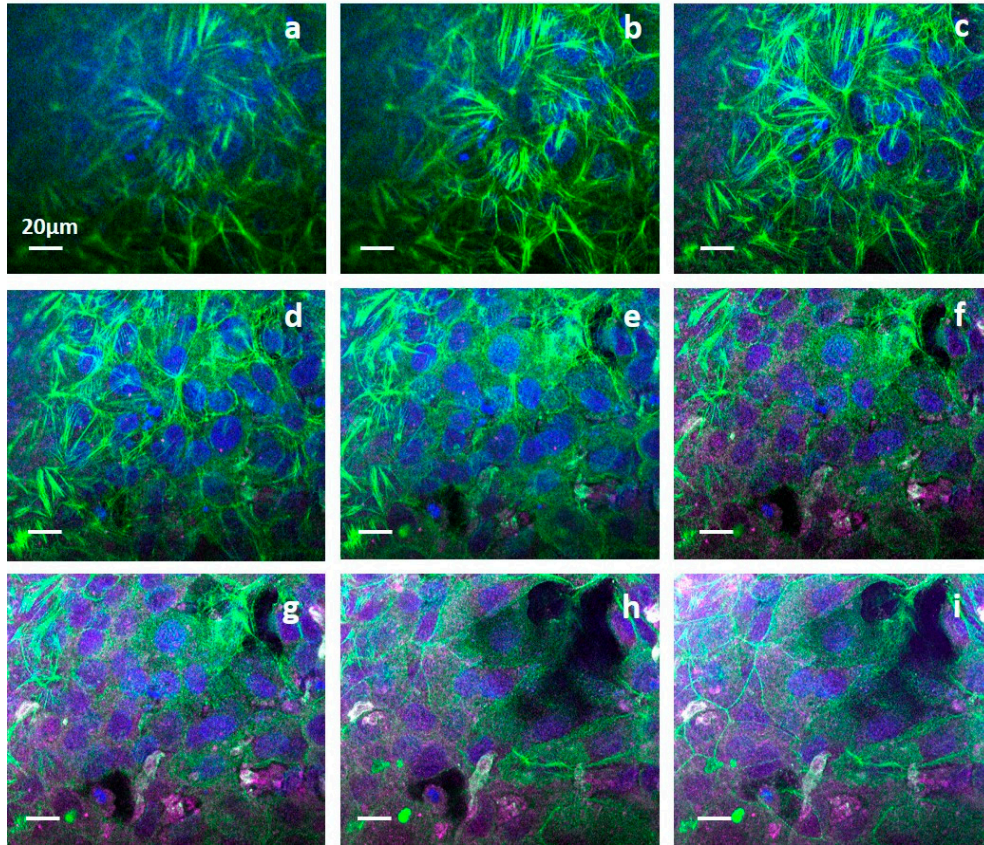

**Figure S 2.** Z-stack images of human keratinocytes after 21 days of culture on microporous chitosan (mp CHT) membrane from the bottom (a) to the uppermost (i) layers. Images were collected at 0.5  $\mu\text{m}$  intervals. Cells were stained for actin (green), cytokeratin CK1 (magenta) and counterstained for nuclei (blue). Scale bar 20  $\mu\text{m}$ .
